# Supplementary material
Source: publisher figshare collection journal article supplement (https://karger.figshare.com/ndownloader/files/17936681)

**Supplementary Figure S1.** Phylogenetic tree constructed by ClustalW on the basis of satellite sequences available for the species of interest. The NCBI accession numbers of the satellite sequences obtained in this study are underlined. The branch lengths are not proportional to evolutionary time.

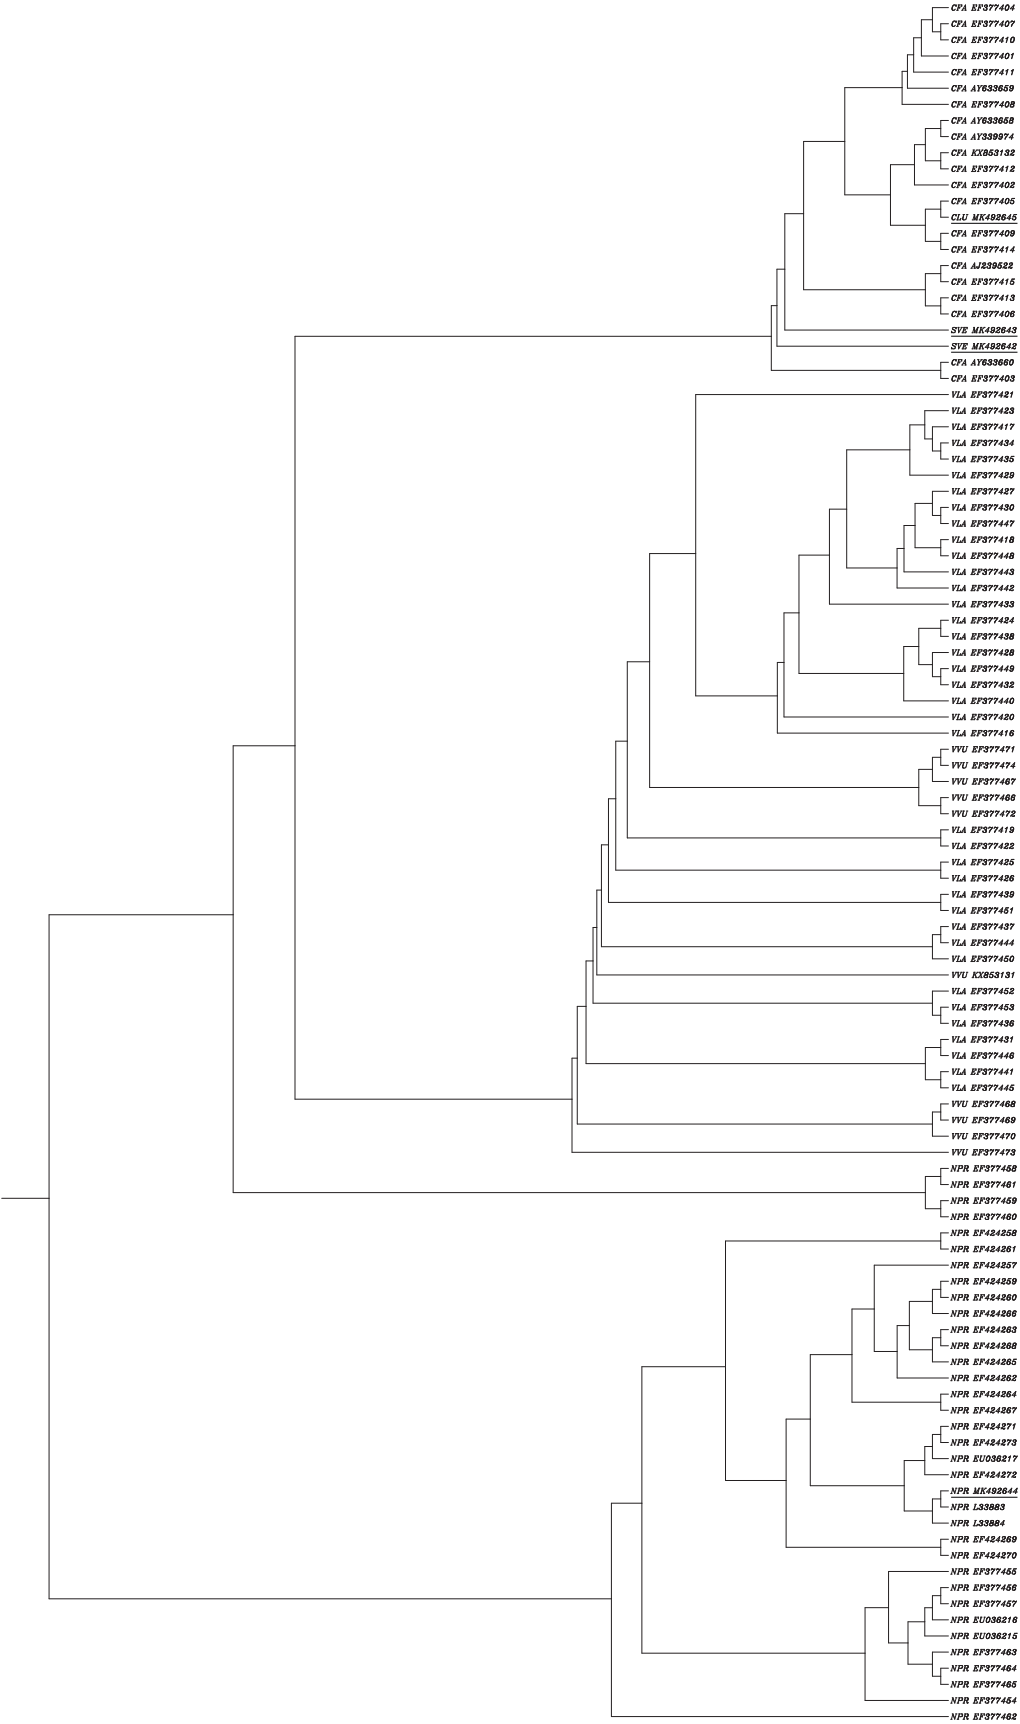

Supplement: Supplementary file 1 [file 17936681]
